# Supplementary material
Source: PubMed Central journal article supplement (PMC8017427)
Supplement: ryai180075suppa1.pdf [file ryai180075suppa1.pdf]

**Table E1: Summary of scanning parameters**

|                                       | H1                           | H2                                 |
|---------------------------------------|------------------------------|------------------------------------|
| Scanner name                          | Achieva, Philips Health Care | GE Signa Excite GE Medical Systems |
| Field Strength                        | 3 Tesla                      | 3 Tesla                            |
| Neurovascular Coil                    | 16-channel                   | 16-channel                         |
| <b>T2-weighted</b>                    |                              |                                    |
| Field of view                         | 22–25                        | 22–24                              |
| Matrix                                | min: 288, max: 640           | min: 340, max: 640                 |
| Slice thickness                       | 3–4 mm                       | 2–4 mm                             |
| Slice gap                             | 0–3 mm                       | 0–3 mm                             |
| Repetition time                       | 3500–4900                    | 4200–4899                          |
| Echo time                             | 50–80                        | 60–80                              |
| Flip angle                            | 60–90                        | 80–90                              |
| <b>Contrast-enhanced T1-weighted*</b> |                              |                                    |
| Field of view                         | 23–25                        | 23–24                              |
| Matrix                                | min: 288, max: 640           | min: 384, max: 640                 |
| Slice thickness                       | 0.7–4 mm                     | 2–4 mm                             |
| Slice gap                             | 0–3 mm                       | 0–3 mm                             |
| Repetition time                       | 4.8–9.4 ms                   | 4.3–8 ms                           |
| Echo time                             | 2.4–8.0 ms                   | 3.0–7.0 ms                         |
| Flip angle                            | 10–90 degrees                | 70–90 degrees                      |

\* For contrast-enhanced scan at both centers, an intravenous bolus injection of 0.1 mmol/kg of body weight gadopentetate dimeglumine was administered at 15 mL/s for post contrast acquisition.

**Table E2: List and description of radiomic features used in the study. Detailed description and formulation of the features are documented in <http://pyradiomics.readthedocs.io/en/latest/features.html>**

| Feature Categories       | Feature Type       | Extraction Parameters                           | Feature Name                                                                                                                                                                                                                                                                                                                                                                                                                        | Feature Description                                                                                           |
|--------------------------|--------------------|-------------------------------------------------|-------------------------------------------------------------------------------------------------------------------------------------------------------------------------------------------------------------------------------------------------------------------------------------------------------------------------------------------------------------------------------------------------------------------------------------|---------------------------------------------------------------------------------------------------------------|
| Shape* ( $n = 5$ )       | N/A                | N/A                                             | Voxel volume, Surface area, Surface to volume ratio, Sphericity, Maximum 3D diameter                                                                                                                                                                                                                                                                                                                                                | Mathematical description of the morphology of the tumor                                                       |
| First-order ( $n = 11$ ) | N/A                | Normalization <sup>‡</sup> : mean $\pm 3\sigma$ | Energy, Entropy, Mean, Median, Range, Mean absolute deviation, Root mean squared, Skewness, Kurtosis, Variance, Uniformity                                                                                                                                                                                                                                                                                                          | Statistical description of the intensity histogram of the tumor                                               |
| Texture ( $n = 41$ )     | GLCM ( $n = 20$ )  | Normalization: mean $\pm 3\sigma$               | Autocorrelation, Cluster prominence, Cluster shade, Cluster tendency, Contrast, Correlation, Difference entropy, Difference average, Joint energy, Joint entropy, Inverse difference, Inverse difference moment, Informational measure of correlation 1, Information measure of correlation 2, Inverse difference moment normalized, Inverse difference normalized, Inverse variance, Maximum probability, Sum entropy, Sum Squares | Statistical description of the probability of occurrence of a pair of voxels and their respective gray level. |
|                          |                    | Intensity scale <sup>§</sup> = 100              |                                                                                                                                                                                                                                                                                                                                                                                                                                     |                                                                                                               |
|                          |                    | Step size <sup>  </sup> = 1                     |                                                                                                                                                                                                                                                                                                                                                                                                                                     |                                                                                                               |
|                          |                    | Bin-width <sup>  </sup> = 5                     |                                                                                                                                                                                                                                                                                                                                                                                                                                     |                                                                                                               |
|                          | GLRLM ( $n = 16$ ) | Normalization: mean $\pm 3\sigma$               | Gray level nonuniformity, Gray level nonuniformity normalized, Gray level variance, High gray level run emphasis, Long run high gray level emphasis,                                                                                                                                                                                                                                                                                | Statistical description of the probability of a consecutive run of voxels with the same gray level.           |
|                          |                    | Intensity scale = 100                           |                                                                                                                                                                                                                                                                                                                                                                                                                                     |                                                                                                               |
|                          |                    | Bin-width = 5                                   |                                                                                                                                                                                                                                                                                                                                                                                                                                     |                                                                                                               |

|                                    |                      |                                          |                                                                                                                                                                                                                   |                                                                                                                                                      |
|------------------------------------|----------------------|------------------------------------------|-------------------------------------------------------------------------------------------------------------------------------------------------------------------------------------------------------------------|------------------------------------------------------------------------------------------------------------------------------------------------------|
|                                    |                      |                                          | Long run low gray level emphasis, Run entropy, Run length nonuniformity, Run length nonuniformity normalized, Run percentage, Run variance, Short run high gray level emphasis, Short run low gray level emphasis |                                                                                                                                                      |
|                                    | NGLDM<br>( $n = 5$ ) | Normalization: $\text{mean} \pm 3\sigma$ | Busyness, Coarseness, Complexity, Contrast, Strength                                                                                                                                                              | Statistical description of the probability of differences between the gray level of a center voxel and average gray level of the neighboring voxels. |
|                                    |                      | Intensity scale = 100                    |                                                                                                                                                                                                                   |                                                                                                                                                      |
|                                    |                      | Bin-width = 5                            |                                                                                                                                                                                                                   |                                                                                                                                                      |
| Wavelet <sup>†</sup> ( $n = 208$ ) | N/A                  | Normalization: $\text{mean} \pm 3\sigma$ | First-order and texture features                                                                                                                                                                                  | Texture and first order description of wavelet decompositions of the image.                                                                          |
|                                    |                      | Intensity scale = 100                    |                                                                                                                                                                                                                   |                                                                                                                                                      |
|                                    |                      | Step size = 1                            |                                                                                                                                                                                                                   |                                                                                                                                                      |
|                                    |                      | Bin-width = 5                            |                                                                                                                                                                                                                   |                                                                                                                                                      |

GLCM = Gray level co-occurrence matrix, GLRLM = Gray level run-length matrix, NGLDM = Neighbor gray level difference matrix.

\* Shape features were extracted from contrast-enhanced T1-weighted sequences only.

† Four subbands of wavelet decompositions were applied (low-low, low-high, high-low, high-high). For each decomposition, texture and first-order features were extracted.

‡ Intensity normalization where intensities that were three standard deviation away from the mean were removed.

§ Intensity scaling default to 100.

|| Scaling factor used for scaling intensities of the image.

¶ Bin-width used for discretization of intensities. This step is required calculation of texture features.
